# Supplementary material for: Health Risk Perception, Consumption Intention, and Willingness to Pay for Pig Products Obtained by Immunocastration
Source: MDPI journal article supplement (doi:10.3390/ani10091548), 2020-09-01
Supplement: s1 [file s1]

Article

# Health Risk Perception, Consumption Intention and Willingness to Pay for Pig Products Obtained by Immunocastration

Jorgelina Di Pasquale <sup>1</sup>, Yari Vecchio <sup>2,\*</sup>, Giovanna Martelli <sup>2</sup>, Luca Sardi <sup>2</sup>, Felice Adinolfi <sup>2</sup> and Eleonora Nannoni <sup>2</sup>

<sup>1</sup> Faculty of Veterinary Medicine, University of Teramo, 64100 Piano D'Accio, Teramo, Italy; jdiapasquale@unite.it (J.D.P.)

<sup>2</sup> Department of Veterinary Medical Sciences, University of Bologna, Via Tolara di Sopra 50, 40064 Ozzano Emilia (BO), Italy; giovanna.martelli@unibo.it (G.M.), luca.sardi@unibo.it (L.S), felice.adinolfi@unibo.it (F.A.), eleonora.nannoni2@unibo.it (E.N.)

\* Correspondence: yari.vecchio@unibo.it

Received: 07 August 2020; Accepted: 26 August 2020; Published: date

**Table S1.** Short, neutral information about immunocastration.

| Neutral Information                                                                                                                                                                                                                                                                                                                                                     |  |
|-------------------------------------------------------------------------------------------------------------------------------------------------------------------------------------------------------------------------------------------------------------------------------------------------------------------------------------------------------------------------|--|
| In many countries of the world male pigs are castrated. The aim of castration is to avoid the development of objectionable meat odours (the so-called 'boar taint', whose development is due to sexual maturity) and to limit aggression and competition between animals.                                                                                               |  |
| One of the most frequently used methods (also in Italy) is surgical castration. According to legislation, surgical castration can be carried out without the administration of anaesthetics and/or analgesics when done within the first week of age. After the 7th day of life, castration must be carried out with the administration of anaesthetics and analgesics. |  |
| In Italy pigs are usually castrated before the 7th day of life.                                                                                                                                                                                                                                                                                                         |  |
| Some alternative castration methods have been proposed. Among these, the most frequently used in countries such as Brazil, New Zealand and Australia is immunocastration. This method consists in the administration of a vaccine which stops the production of sexual hormones, therefore, preventing sexual maturity.                                                 |  |

**Table S2.** Socio-demographic variables used in logit regression.

| Gender:    |           |           |            |                  |                       |
|------------|-----------|-----------|------------|------------------|-----------------------|
| Statistics | Variables | Frequency | Percentage | Percentage Valid | Cumulative percentage |
| Valid      | Male      | 485       | 50,0       | 50,1             | 50,1                  |
|            | Female    | 484       | 49,9       | 49,9             | 100,0                 |
|            | Total     | 969       | 99,9       | 100,0            |                       |
| Missing    | Sistem    | 1         | ,1         |                  |                       |
| Total      | 970       | 100,0     |            |                  |                       |

| Education  |                |           |            |                  |                       |
|------------|----------------|-----------|------------|------------------|-----------------------|
| Statistics | Variables      | Frequency | Percentage | Percentage Valid | Cumulative percentage |
| Valid      | Primary school | 6         | ,6         | ,6               | ,6                    |
|            | Middle school  | 94        | 9,7        | 9,7              | 10,3                  |
|            | High school    | 531       | 54,7       | 54,8             | 65,1                  |
|            | 3-year         | 133       | 13,7       | 13,7             | 78,8                  |

|         |                                |       |      |       |       |
|---------|--------------------------------|-------|------|-------|-------|
|         | university<br>degree<br>5-year | 205   | 21,1 | 21,2  | 100,0 |
|         | university<br>degree<br>Total  | 969   | 99,9 | 100,0 |       |
| Missing | Sistem                         | 1     | ,1   |       |       |
| Total   | 970                            | 100,0 |      |       |       |

| Household size |           |           |            |                  |                       |
|----------------|-----------|-----------|------------|------------------|-----------------------|
| Statistics     | Variables | Frequency | Percentage | Percentage Valid | Cumulative percentage |
| Valid          | 1         | 73        | 7,5        | 7,5              | 7,5                   |
|                | 2         | 233       | 24,0       | 24,0             | 31,6                  |
|                | 3         | 277       | 28,6       | 28,6             | 60,2                  |
|                | 4         | 308       | 31,8       | 31,8             | 92,0                  |
|                | 5         | 68        | 7,0        | 7,0              | 99,0                  |
|                | 6         | 8         | ,8         | ,8               | 99,8                  |
|                | 7         | 2         | ,2         | ,2               | 100,0                 |
|                | Totale    | 969       | 99,9       | 100,0            |                       |
| Missing        | Sistema   | 1         | ,1         |                  |                       |
| Total          | 970       | 100,0     |            |                  |                       |

| Annual household income: |                   |           |            |                  |                       |
|--------------------------|-------------------|-----------|------------|------------------|-----------------------|
| Statistic                | Variables         | Frequency | Percentage | Percentage Valid | Cumulative percentage |
| Valid                    | -10.000 €         | 102       | 10,5       | 10,5             | 10,5                  |
|                          | 11.000 - 20.000 € | 226       | 23,3       | 23,3             | 33,8                  |
|                          | 21.000 - 35.000 € | 337       | 34,7       | 34,8             | 68,6                  |
|                          | 36.000 - 50.000 € | 210       | 21,6       | 21,7             | 90,3                  |
|                          | 51.000 - 75.000 € | 73        | 7,5        | 7,5              | 97,8                  |
|                          | + 75.000          | 21        | 2,2        | 2,2              | 100,0                 |
|                          | Total             | 969       | 99,9       | 100,0            |                       |
| Missing                  | Sistem            | 1         | ,1         |                  |                       |
| Total                    | 970               | 100,0     |            |                  |                       |

| Area      |            |           |            |                  |                       |
|-----------|------------|-----------|------------|------------------|-----------------------|
| Statistic | Variables  | Frequency | Percentage | Percentage Valid | Cumulative percentage |
| Valid     | Northwest  | 248       | 25,6       | 25,6             | 25,6                  |
|           | North East | 186       | 19,2       | 19,2             | 44,8                  |
|           | Center     | 183       | 18,9       | 18,9             | 63,7                  |

|        |        |       |      |       |       |
|--------|--------|-------|------|-------|-------|
|        | South  | 238   | 24,5 | 24,6  | 88,2  |
|        | Island | 114   | 11,8 | 11,8  | 100,0 |
|        | Total  | 969   | 99,9 | 100,0 |       |
| Missin | Sistem | 1     | ,1   |       |       |
| g      |        |       |      |       |       |
| Total  | 970    | 100,0 |      |       |       |

---

| Urban o Rural Area |           |           |            |                  |                       |
|--------------------|-----------|-----------|------------|------------------|-----------------------|
| Statistic          | Variables | Frequency | Percentage | Percentage Valid | Cumulative percentage |
| Valid              | Urban     | 847       | 87,3       | 87,4             | 87,4                  |
|                    | Rural     | 122       | 12,6       | 12,6             | 100,0                 |
|                    | Total     | 969       | 99,9       | 100,0            |                       |
| Missing            | Sistem    | 1         | ,1         |                  |                       |
| Total              | 970       | 100,0     |            |                  |                       |

**Table S3.** Output of post-hoc Scheffe Test ( $p < 0.05$ ); \* indicates that the mean difference is significant.

| Multiple Comparisons                                                                                                                                                                                                                                                   |         |                                                                                        |                                                                                        |  | Mean Difference (I-J) | Std. Error | Sig.  |
|------------------------------------------------------------------------------------------------------------------------------------------------------------------------------------------------------------------------------------------------------------------------|---------|----------------------------------------------------------------------------------------|----------------------------------------------------------------------------------------|--|-----------------------|------------|-------|
| Dependent Variable                                                                                                                                                                                                                                                     |         |                                                                                        |                                                                                        |  |                       |            |       |
| Assuming that the abandonment of surgical castration and the adoption of immunocastration would improve pig welfare, at what extent, would you be willing to consume products obtained through the use of immunocastration? Please rate your score on a 0 to 100 scale | Scheffe | Pork from animals surgically castrated                                                 | Pork from immunocastrated animals                                                      |  | -29,355               | 3,705      | 0     |
|                                                                                                                                                                                                                                                                        |         |                                                                                        | Pork from animals surgically castrated with the administration of anesthesia/analgesia |  | -9,605                | 3,953      | 0,207 |
|                                                                                                                                                                                                                                                                        |         |                                                                                        | Pork from animals genetically selected for their low risk of developing boar taint     |  | -12,652               | 4,125      | 0,052 |
|                                                                                                                                                                                                                                                                        |         |                                                                                        | Pork from entire (non castrated) animals (I do not care of boar taint)                 |  | -5,418                | 3,941      | 0,756 |
|                                                                                                                                                                                                                                                                        |         | Pork from immunocastrated animals                                                      | Pork from animals surgically castrated                                                 |  | 29,355                | 3,705      | 0     |
|                                                                                                                                                                                                                                                                        |         |                                                                                        | Pork from animals surgically castrated with the administration of anesthesia/analgesia |  | 19,751                | 2,791      | 0     |
|                                                                                                                                                                                                                                                                        |         |                                                                                        | Pork from animals genetically selected for their low risk of developing boar taint     |  | 16,703                | 3,029      | 0     |
|                                                                                                                                                                                                                                                                        |         |                                                                                        | Pork from entire (non castrated) animals (I do not care of boar taint)                 |  | 23,937                | 2,774      | 0     |
|                                                                                                                                                                                                                                                                        |         | Pork from animals surgically castrated with the administration of anesthesia/analgesia | Pork from animals surgically castrated                                                 |  | 9,605                 | 3,953      | 0,207 |
|                                                                                                                                                                                                                                                                        |         |                                                                                        | Pork from immunocastrated animals                                                      |  | -19,751               | 2,791      | 0     |
|                                                                                                                                                                                                                                                                        |         |                                                                                        | Pork from animals genetically selected for their low risk of developing boar taint     |  | -3,048                | 3,328      | 0,933 |
|                                                                                                                                                                                                                                                                        |         |                                                                                        | Pork from entire (non castrated) animals (I do not care of boar taint)                 |  | 4,186                 | 3,098      | 0,768 |
|                                                                                                                                                                                                                                                                        | Scheffe | Pork from animals genetically selected for their low risk of developing boar taint     | Pork from animals surgically castrated                                                 |  | 12,652                | 4,125      | 0,052 |
|                                                                                                                                                                                                                                                                        |         |                                                                                        | Pork from immunocastrated animals                                                      |  | -16,703               | 3,029      | 0     |
|                                                                                                                                                                                                                                                                        |         |                                                                                        | Pork from animals surgically castrated with the administration of anesthesia/analgesia |  | 3,048                 | 3,328      | 0,933 |
|                                                                                                                                                                                                                                                                        |         |                                                                                        | Pork from entire (non castrated) animals (I do not care of boar taint)                 |  | 7,234                 | 3,314      | 0,313 |
|                                                                                                                                                                                                                                                                        |         | Pork from entire (non castrated) animals (I do not care of boar taint)                 | Pork from animals surgically castrated                                                 |  | 5,418                 | 3,941      | 0,756 |
|                                                                                                                                                                                                                                                                        |         |                                                                                        | Pork from immunocastrated animals                                                      |  | -23,937               | 2,774      | 0     |
|                                                                                                                                                                                                                                                                        |         |                                                                                        | Pork from animals surgically castrated with the administration of anesthesia/analgesia |  | -4,186                | 3,098      | 0,768 |
|                                                                                                                                                                                                                                                                        |         |                                                                                        | Pork from animals genetically selected for their low risk of developing boar taint     |  | -7,234                | 3,314      | 0,313 |
|                                                                                                                                                                                                                                                                        | Scheffe | Pork from animals surgically castrated                                                 | Pork from immunocastrated animals                                                      |  | 21,132                | 3,115      | 0     |
|                                                                                                                                                                                                                                                                        |         |                                                                                        | Pork from animals surgically castrated with the administration of anesthesia/analgesia |  | 5,896                 | 3,324      | 0,534 |
|                                                                                                                                                                                                                                                                        |         |                                                                                        | Pork from animals genetically selected for their low risk of developing boar taint     |  | 3,882                 | 3,469      | 0,869 |
|                                                                                                                                                                                                                                                                        |         |                                                                                        | Pork from entire (non castrated) animals (I do not care of boar taint)                 |  | 3,862                 | 3,314      | 0,851 |
|                                                                                                                                                                                                                                                                        |         | Pork from immunocastrated animals                                                      | Pork from animals surgically castrated                                                 |  | -21,132               | 3,115      | 0     |
|                                                                                                                                                                                                                                                                        |         |                                                                                        | Pork from animals surgically castrated with the administration of anesthesia/analgesia |  | -15,236               | 2,347      | 0     |
|                                                                                                                                                                                                                                                                        |         |                                                                                        | Pork from animals genetically selected for their low risk of developing boar taint     |  | -17,250               | 2,547      | 0     |
|                                                                                                                                                                                                                                                                        |         |                                                                                        | Pork from entire (non castrated) animals (I do not care of boar taint)                 |  | -17,270               | 2,333      | 0     |
|                                                                                                                                                                                                                                                                        | Scheffe | Pork from animals surgically castrated with the administration of anesthesia/analgesia | Pork from animals surgically castrated                                                 |  | -5,896                | 3,324      | 0,534 |
|                                                                                                                                                                                                                                                                        |         |                                                                                        | Pork from immunocastrated animals                                                      |  | 15,236                | 2,347      | 0     |
|                                                                                                                                                                                                                                                                        |         |                                                                                        | Pork from animals genetically selected for their low risk of developing boar taint     |  | -2,014                | 2,799      | 0,972 |
|                                                                                                                                                                                                                                                                        |         |                                                                                        | Pork from entire (non castrated) animals (I do not care of boar taint)                 |  | -2,033                | 2,605      | 0,962 |
|                                                                                                                                                                                                                                                                        |         | Pork from animals genetically selected for their low risk of developing boar taint     | Pork from animals surgically castrated                                                 |  | -3,882                | 3,469      | 0,869 |
|                                                                                                                                                                                                                                                                        |         |                                                                                        | Pork from immunocastrated animals                                                      |  | 17,250                | 2,547      | 0     |
|                                                                                                                                                                                                                                                                        |         |                                                                                        | Pork from animals surgically castrated with the administration of anesthesia/analgesia |  | 2,014                 | 2,799      | 0,972 |
|                                                                                                                                                                                                                                                                        |         |                                                                                        | Pork from entire (non castrated) animals (I do not care of boar taint)                 |  | -0,02                 | 2,787      | 1     |
|                                                                                                                                                                                                                                                                        | Scheffe | Pork from entire (non castrated) animals (I do not care of boar taint)                 | Pork from animals surgically castrated                                                 |  | -3,862                | 3,314      | 0,851 |
|                                                                                                                                                                                                                                                                        |         |                                                                                        | Pork from immunocastrated animals                                                      |  | 17,270                | 2,333      | 0     |
|                                                                                                                                                                                                                                                                        |         |                                                                                        | Pork from animals surgically castrated with the administration of anesthesia/analgesia |  | 2,033                 | 2,605      | 0,962 |
|                                                                                                                                                                                                                                                                        |         |                                                                                        | Pork from animals genetically selected for their low risk of developing boar taint     |  | 0,02                  | 2,787      | 1     |

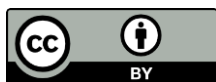

© 2020 by the authors. Submitted for possible open access publication under the terms and conditions of the Creative Commons Attribution (CC BY) license (<http://creativecommons.org/licenses/by/4.0/>).
